# Supplementary material for: Nanocomposites of 2D-MoS2nanosheets with the metal–organic framework, ZIF-8
Source: Royal Society of Chemistry journal article supplement (doi:10.1039/c6dt02667b), 2016-01-01
Supplement: c6dt02667b1.pdf [file c6dt02667b1.pdf]

## Electronic Supplementary Information

### Nanocomposites of 2D-MoS<sub>2</sub> nanosheets with the metal-organic framework, ZIF-8

K. Pramoda, Manjodh Kaur, Uttam Gupta and C. N. R. Rao<sup>\*[a]</sup>

<sup>a</sup> New Chemistry Unit, Chemistry and Physics Materials Unit  
CSIR center of excellence in chemistry, Sheikh Saqr Laboratory, Jawaharlal Nehru Centre for  
Advanced Scientific Research, Jakkur P. O., Bangalore 560064 (India).

\* E-mail: cnrrao@jncasr.ac.in

#### Experimental section:

**Reagents and precursors:** All Chemicals and reagents used in synthesis were of high purity and are obtained from commercial sources.

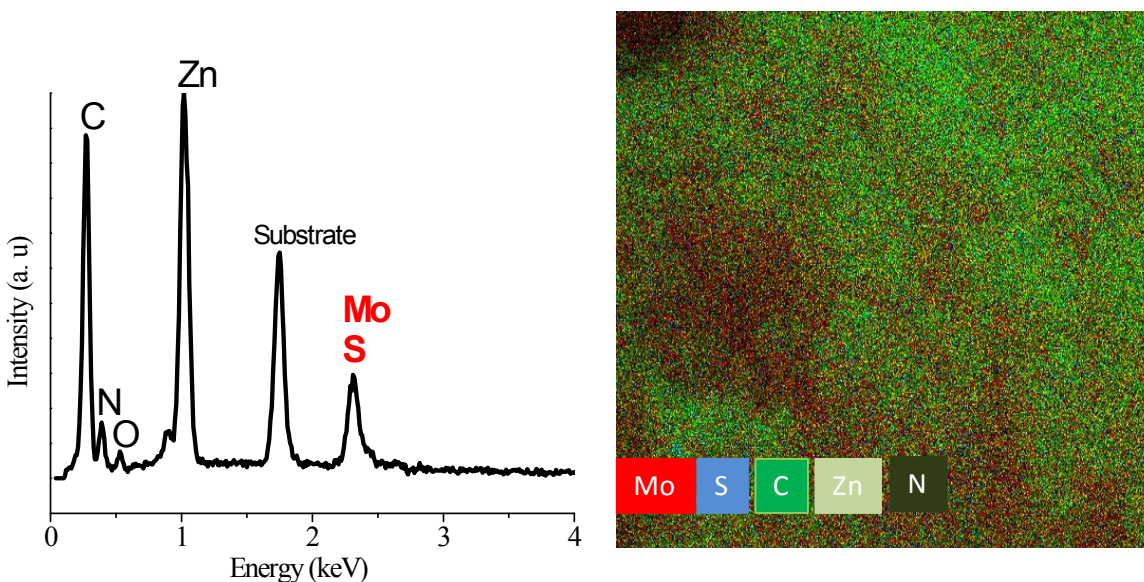

**Fig. S1** Energy dispersive X-ray (EDAX) analysis of ZM-10 nanocomposite showing presence of C, N, O, Zn, Mo, S signals.

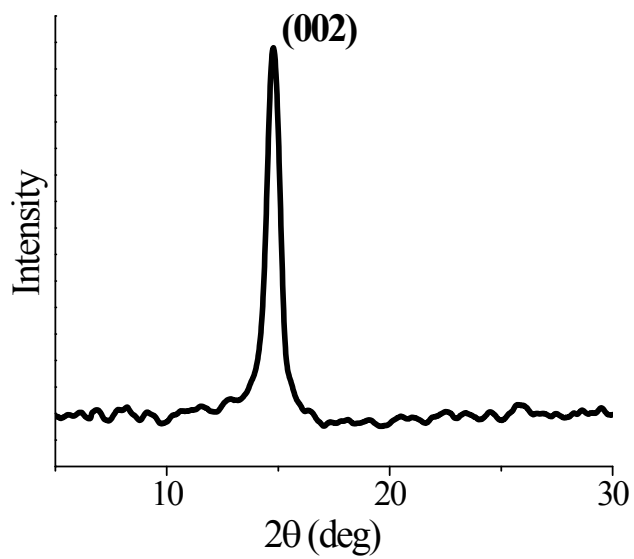

**Fig. S2** (a) PXRD pattern of 1T-MoS<sub>2</sub>.

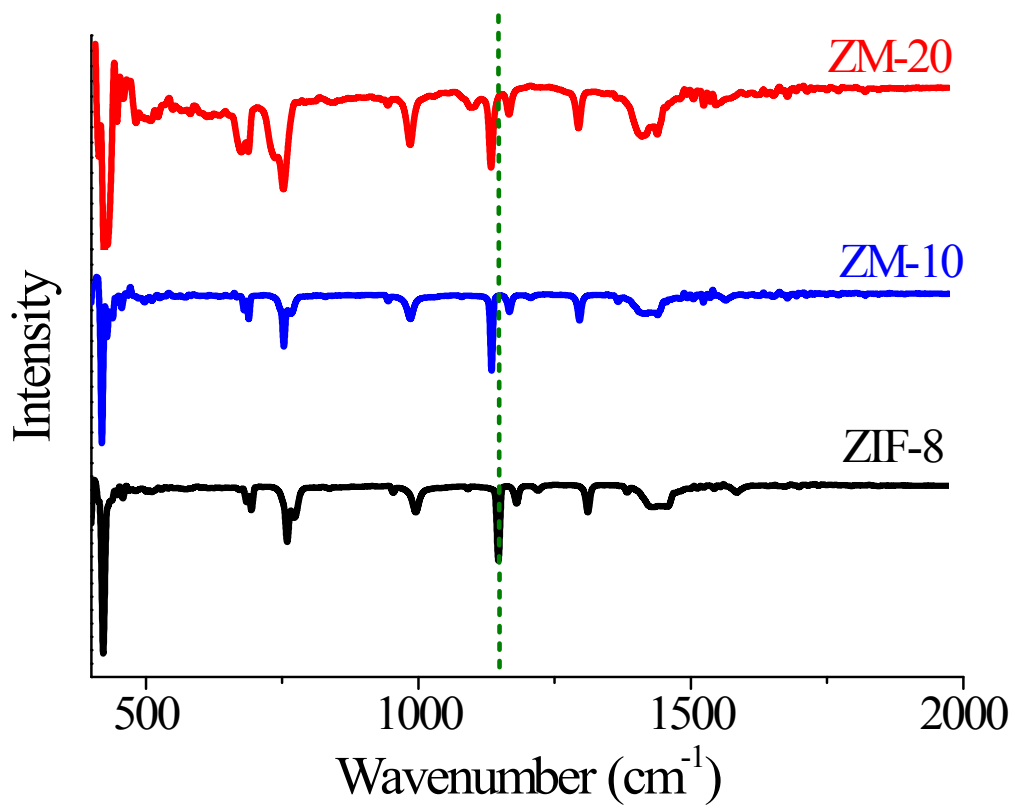

**Fig. S3** Infrared spectra of ZIF-8, ZM-10 and ZM-20.

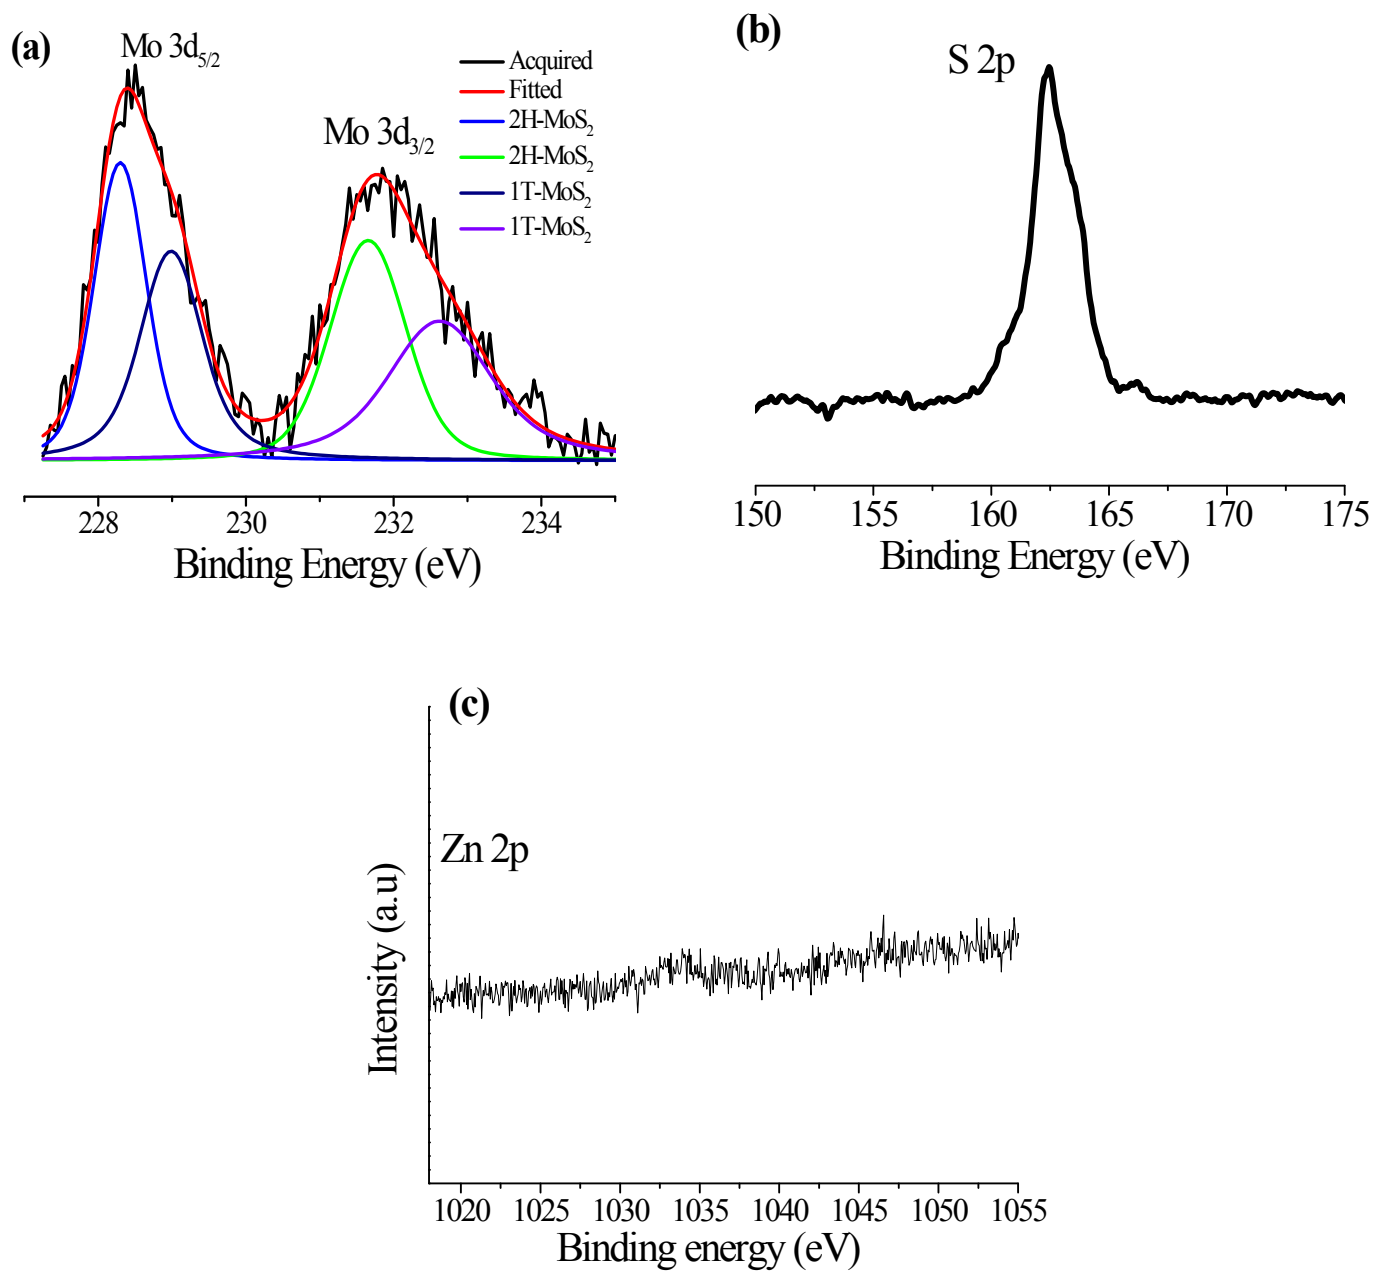

**Fig. S4** High resolution (a) Mo (3d), (b) S (2p) and (c) Zn (2p) X-ray photoelectron spectrum of 1T-MoS<sub>2</sub>. (Mo (3d) peaks are deconvoluted to show 1T and 2H components).

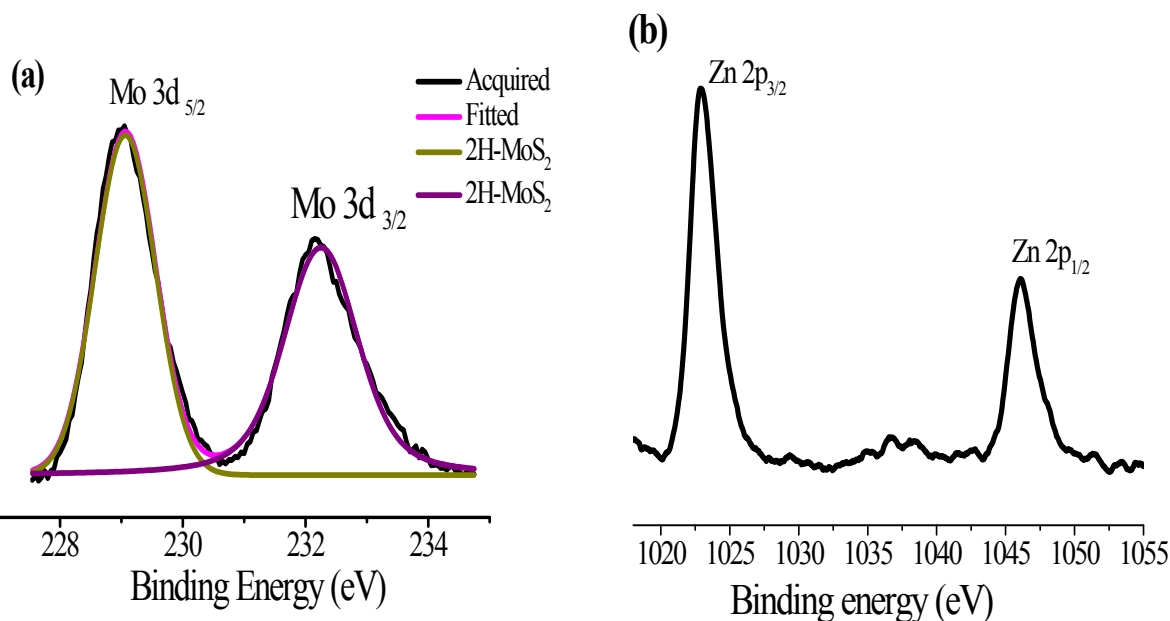

**Fig. S5** High resolution (a) Mo (3d) and (c) Zn (2p) X-ray photoelectron spectrum of ZM-10.

On exfoliating bulk MoS<sub>2</sub> which is in 2H-form by nature partially converts to metallic 1T-polytype, quantification of different polytypes through XPS is difficult since some of transformed 1T-MoS<sub>2</sub> reverts back to 2H-phase while drying process; unavoidable during preparation of sample. Even though we obtained 1T/2H ratio of ~ 48 % in case of exfoliated MoS<sub>2</sub> as revealed by the convoluted Mo (3d) core level signals (Fig. S4) while MoS<sub>2</sub>-ZIF-8 exhibits peaks only due to 2H-phase (Fig. S5). Since core level Mo (3d) signals of 1T-MoS<sub>2</sub> are broader, and it is a combination of different components (1T and 2H-phase) difficult to correlate these core level signals.

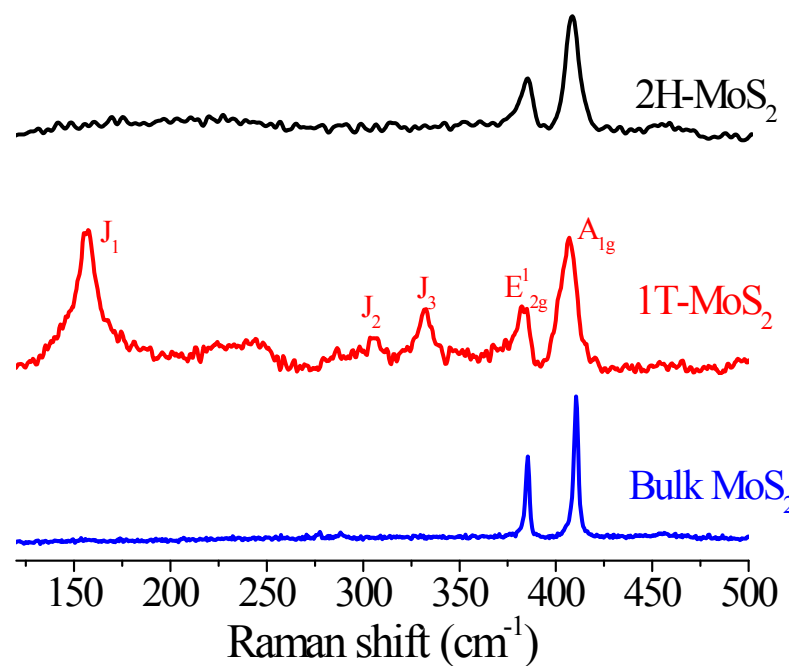

**Fig. S6** Raman spectra of bulk, 1T and 2H MoS<sub>2</sub>.

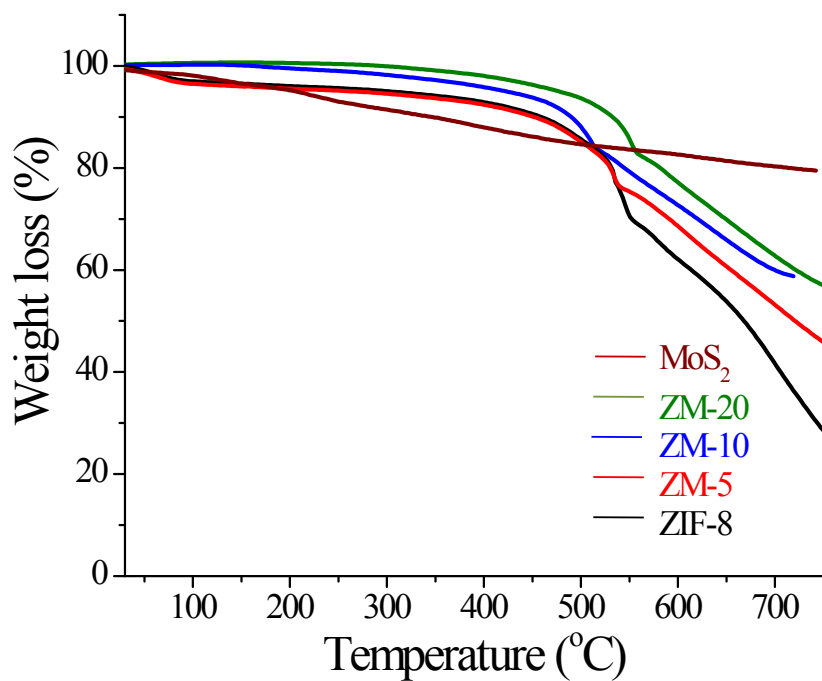

**Fig. S7** Thermo gravimetric profile of ZIF-8, ZM-5, ZM-10, ZM-20 and MoS<sub>2</sub> in a nitrogen atmosphere.

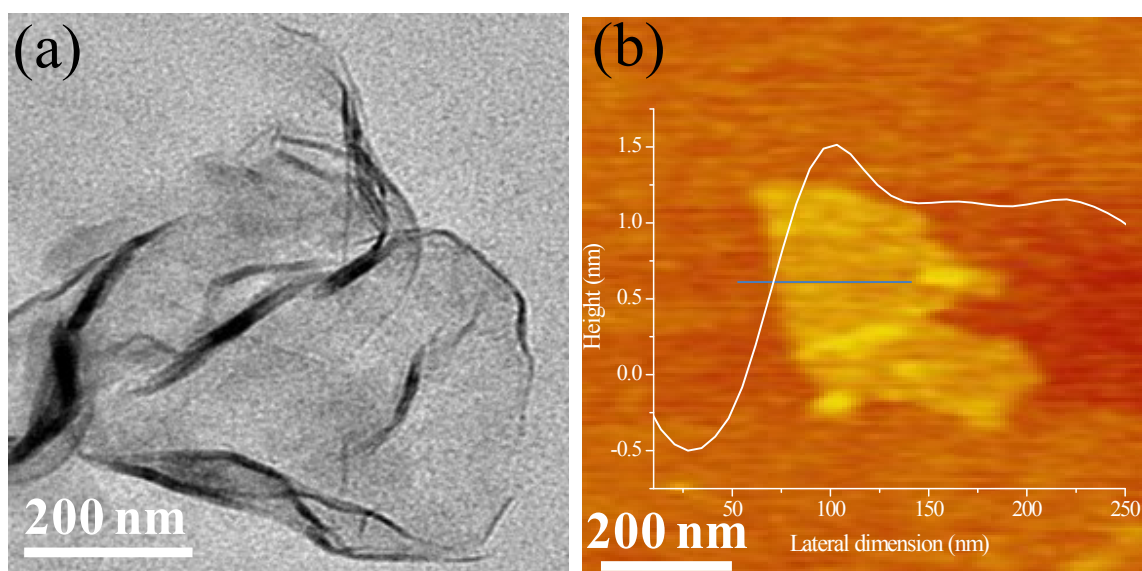

**Fig. S8** (a) TEM and (b) AFM image of exfoliated MoS<sub>2</sub>.

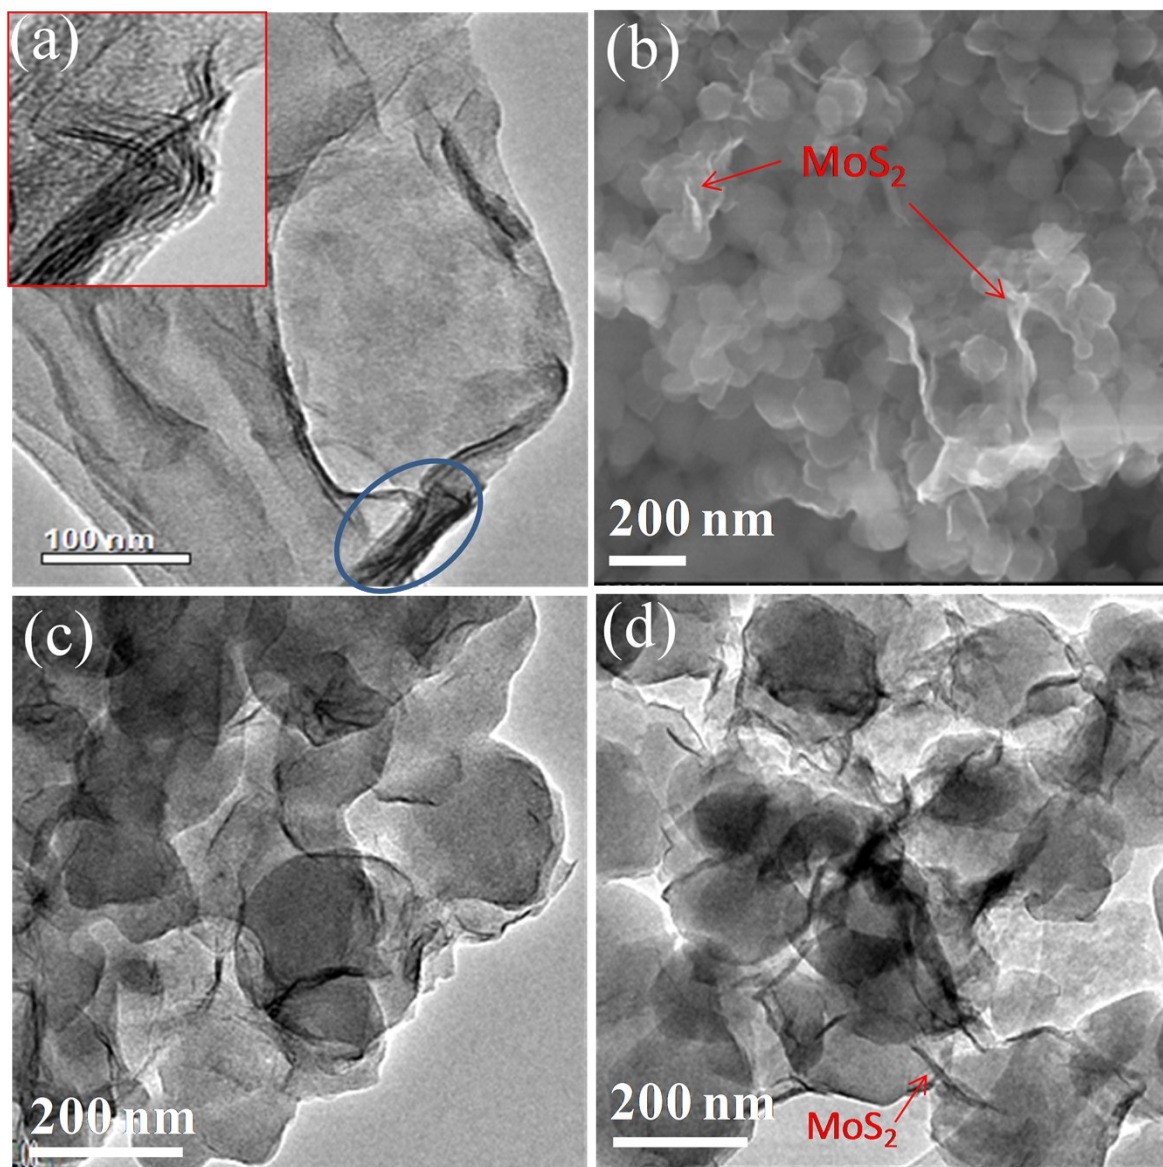

**Fig. S9** (a) TEM image of exfoliated MoS<sub>2</sub>, (b) FESEM images of ZM-5 and (c, d) TEM images of ZM-10 and ZM-20.



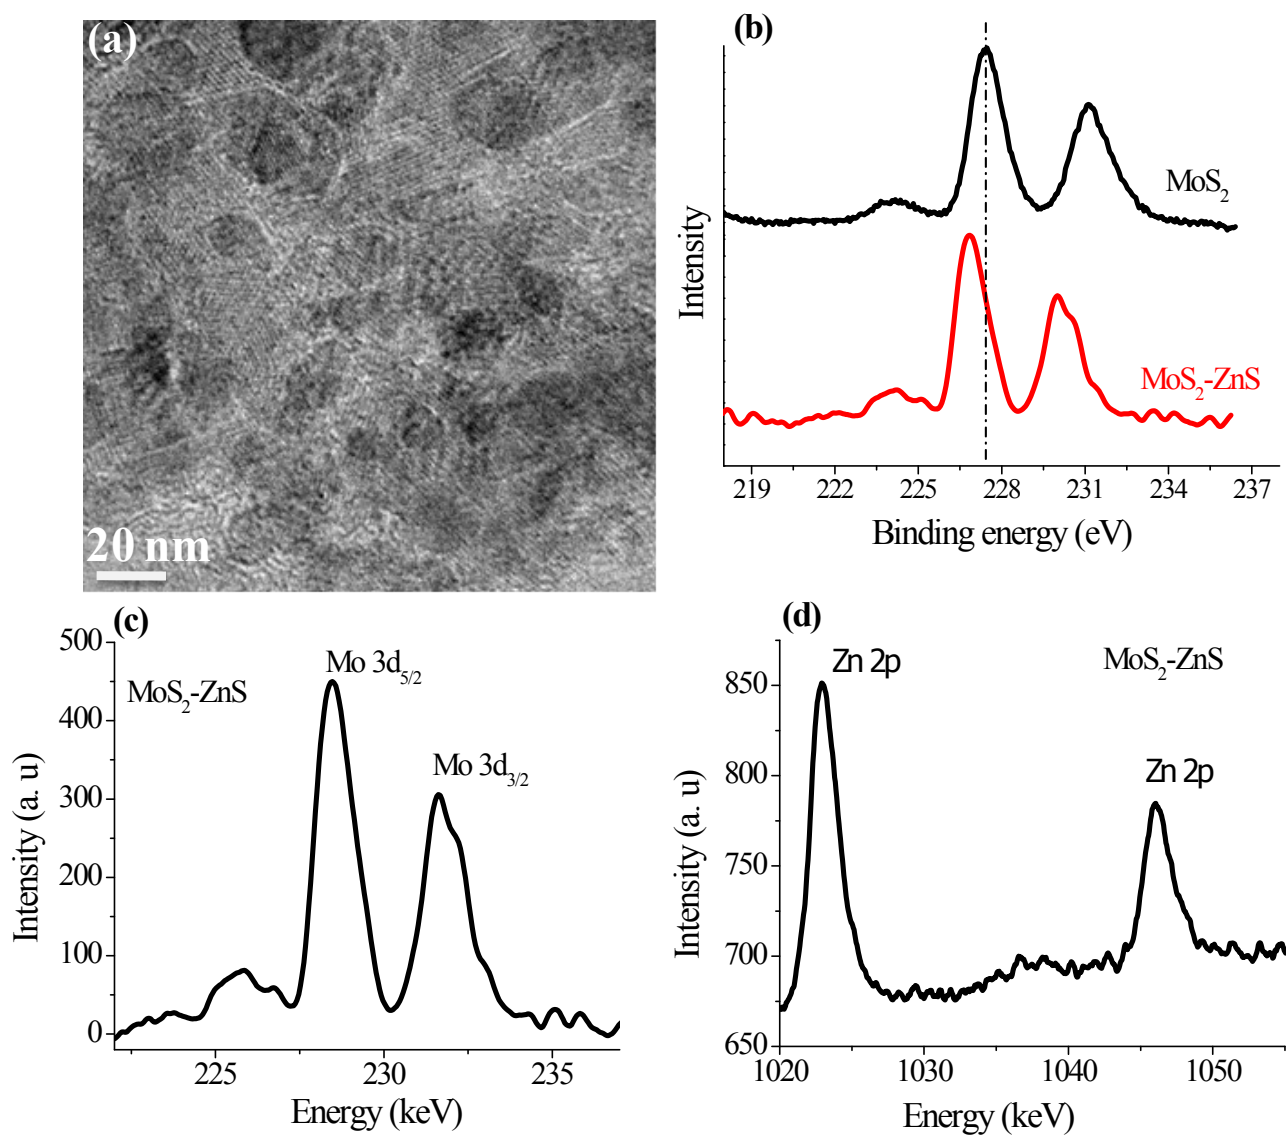

**Fig. S10** (a) HRTEM image of MoS<sub>2</sub>-ZnS; (b) High resolution Mo (3d) X-ray photoelectron spectra of MoS<sub>2</sub> and MoS<sub>2</sub>-ZnS obtained from ZM-20; (c, d) High resolution Mo (3d) and Zn (2p) X-ray photoelectron spectrum of MoS<sub>2</sub>-ZnS.



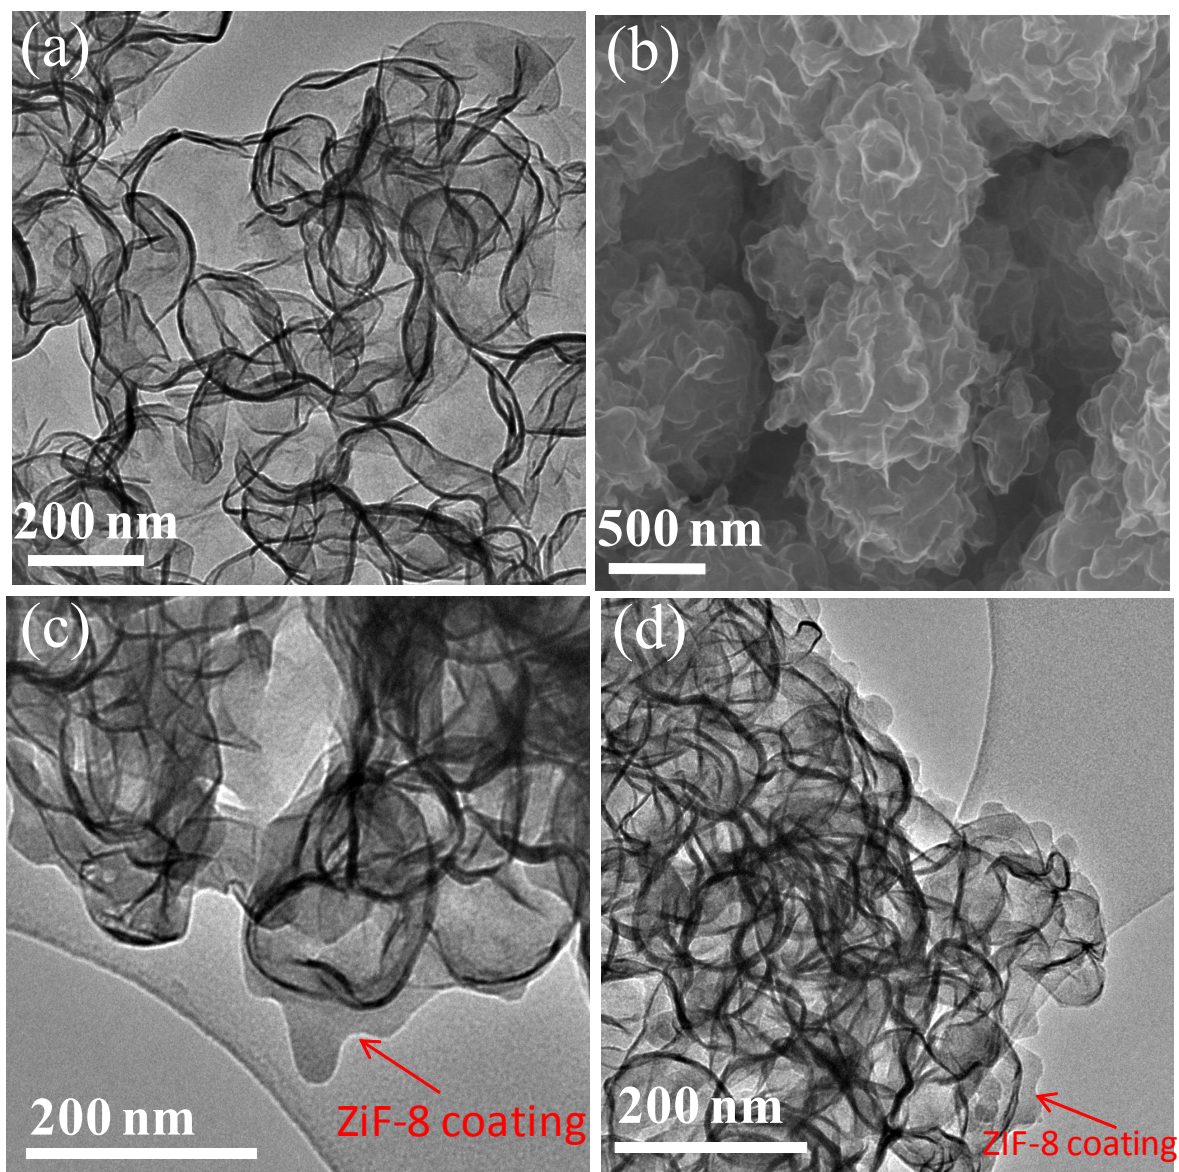

**Fig. S11** (a, b) TEM and FESEM images of 2H-MoS<sub>2</sub> and (c, d) TEM images of and MoS<sub>2</sub>-ZIF-8 (Arrows indicates ZIF-8 coating over nanosheets) obtained from 2H-MoS<sub>2</sub>.

To confirm the coordination modulation effect of negatively charged sulfur, we have prepared MoS<sub>2</sub>-ZIF-8 composite starting from 2H-MoS<sub>2</sub> instead of 1T-polytype with the similar procedure. Unlike the situation of 1T-MoS<sub>2</sub>, semiconducting 2H-MoS<sub>2</sub> does not have negative charges on sulfur atoms of basal-plane. 2H-MoS<sub>2</sub> nanosheets required for these experiments are obtained from hydrothermal method.<sup>1</sup> On in-situ composite formation (similar procedure like 1T-MoS<sub>2</sub>) we observed coating of ZIF-8 at the 2H-MoS<sub>2</sub> nanosheet edges as revealed by TEM images (Figures S11a, b), in contrast to ZM nanocomposites. The ZIF-8 coating is attributed to the dangling bonds of 2H-MoS<sub>2</sub> at the edges which are the only nucleation sites for available for ZIF-8 precursor's results in the growth at the edge sites in the absence of basal-plane negative charges.

#### Reference

1. K. Pramoda, K. Moses, U. Maitra and C. N. R. Rao, *Electroanalysis*, 2015, **27**,1892.
